# Supplementary material for: Microbial utilization of lignin-derived aromatics via a synthetic catechol meta-cleavage pathway
Source: Royal Society of Chemistry journal article supplement (doi:10.1039/d1gc02347k), 2021-01-01
Supplement: d1gc02347k1.pdf [file d1gc02347k1.pdf]

Supplementary file

**Towards Synthetic Ligninolysis via Microbial Utilization of Lignin Degraded Aromatics**

Ruihua Zhang et. al.

**Supplementary Table 1. Plasmids and strains used in this study.**

| Plasmid           | Description                                                                                      | Source     |
|-------------------|--------------------------------------------------------------------------------------------------|------------|
| pETDuet-1         | pT7lac; <i>colE</i> ori; Amp <sup>R</sup>                                                        | Promega    |
| pZE12-luc         | PLlacO1, <i>colE</i> ori, Amp <sup>R</sup>                                                       | 1          |
| pCS27             | PLlacO1, <i>P15A</i> ori, Kan <sup>R</sup>                                                       | 2          |
| pCP20             | Flippase, AmpR, and temperature-sensitive replicon                                               | 3          |
| pET-xylE          | pETDuet-1 harboring <i>xylE</i> from <i>P. putida</i> mt-2                                       | This study |
| pET-xylG          | pETDuet-1 harboring <i>xylG</i> from <i>P. putida</i> mt-2                                       | This study |
| pET-xylF          | pETDuet-1 harboring <i>xylF</i> from <i>P. putida</i> mt-2                                       | This study |
| pZE-aroY          | pZE12-luc harboring <i>aroY</i> from <i>K. pneumoniae</i> (ATCC 25955)                           | This study |
| pZE-aroY-hp1      | pZE12-luc harboring <i>aroY-hp1</i> from <i>K. pneumoniae</i> (ATCC 25955)                       | This study |
| pZE-aroY-hp1-hp2  | pZE12-luc harboring <i>aroY-hp1-hp2</i> from <i>K. pneumoniae</i> (ATCC 25955)                   | This study |
| pZE-aroY-kpdB     | pZE12-luc harboring <i>aroY-kpdB</i> from <i>K. pneumoniae</i> (ATCC 25955)                      | This study |
| pZE-kpdBCD        | pZE12-luc harboring <i>kpdBCD</i> from <i>K. pneumoniae</i> (ATCC 25955)                         | This study |
| pCS-xylE-aroY-hp1 | pCS27 harboring <i>xylE</i> and <i>aroY-hp1</i>                                                  | This study |
| pZE-xylF-mhpD     | pZE12-luc harboring <i>xylF</i> from <i>P. putida</i> mt-2 and <i>mhpD</i> from <i>E. coli</i>   | This study |
| pZE-xylF-xylJ     | pZE12-luc harboring <i>xylF</i> and <i>xylJ</i> from <i>P. putida</i> mt-2                       | This study |
| pZE-xylGHI-mhpD   | pZE12-luc harboring <i>xylGHI</i> from <i>P. putida</i> mt-2 and <i>mhpD</i> from <i>E. coli</i> | This study |
| pZE-xylGHI-xylJ   | pZE12-luc harboring <i>xylGHI</i> and <i>xylJ</i> from <i>P. putida</i> mt-2                     | This study |
| pCS-kivD-adh6     | pCS27 harboring <i>kivD-adh6</i> operon                                                          | This study |
| pZE-FJKA          | pZE12-luc harboring dual operons of <i>xylF-xylJ</i> and <i>kivD-adh6</i>                        | This study |
| pZE-FDKA          | pZE12-luc harboring dual operons of <i>xylF-mhpD</i> and <i>kivD-adh6</i>                        | This study |
| pZE-GJKA          | pZE12-luc harboring dual operons of <i>xylGHI-xylJ</i> and <i>kivD-adh6</i>                      | This study |
| pZE-GDKA          | pZE12-luc harboring dual operons of <i>xylGHI-mhpD</i> and <i>kivD-adh6</i>                      | This study |
| pZE-vanAB         | pZE12-luc harboring <i>vanAB</i> operon                                                          | This study |
| pZE-vdh           | pZE12-luc harboring <i>vdh</i>                                                                   | This study |
| pCS-VIV           | pCS27 harboring <i>vanAB-iem-vdh</i> operon                                                      | This study |
| pZE-xylF-cimA*    | pZE12-luc <i>xylF-cimA*</i> operon                                                               | This study |
| pZE-XCH           | pZE12-luc harboring dual operons of <i>xylF-cimA*</i> and <i>aroY-hp1</i>                        | This study |

| pZE-XCB                         | pZE12-luc harboring dual operons of <i>xylF-cimA*</i> and <i>aroY-kpdB</i>                                                                                                   | This study |
|---------------------------------|------------------------------------------------------------------------------------------------------------------------------------------------------------------------------|------------|
| pZE-XCBCD                       | pZE12-luc harboring dual operons of <i>xylF-cimA*</i> and <i>kpdBCD</i>                                                                                                      | This study |
| pCS-xylE                        | pCS27 harboring <i>xylE</i>                                                                                                                                                  | This study |
| pCS-xylE-mhpDFE                 | pCS27 harboring <i>xylE</i> and <i>mhpDFE</i> operons from <i>E. coli</i>                                                                                                    | This study |
| pZE-xylE-mhpDFE                 | pZE12-luc harboring <i>xylE-mhpDFE</i> operon                                                                                                                                | This study |
| pCS-VIV-XEM                     | pCS27 harboring dual operons of <i>vanAB-iem-vdh</i> and <i>xylE-mhpDFE</i>                                                                                                  | This study |
| pZE-vdh-xylF-cimA*              | pZE12-luc harboring <i>vdh-xylF-cimA*</i> operon                                                                                                                             | This study |
| pZE-VXCH                        | pZE12-luc harboring dual operons of <i>vdh-xylF-cimA*</i> and <i>aroY-hp1</i>                                                                                                | This study |
| pZE-VXCB                        | pZE12-luc harboring dual operons of <i>vdh-xylF-cimA*</i> and <i>aroY-kpdB</i>                                                                                               | This study |
| Strains                         | Description                                                                                                                                                                  | Source     |
| <i>E. coli</i> XL1-Blue         | <i>recA1 endA1 gyrA96 thi-1 hsdR17 supE44 relA1 lac</i> [F' <i>proAB lacIqZ</i> $\Delta$ M15 Tn10 (TetR)]                                                                    | Stratagene |
| <i>E. coli</i> BW25113 (F')     | <i>rrnBT14 <math>\Delta</math>lac ZWJ16 hsdR514 <math>\Delta</math>araBADAH33 <math>\Delta</math>rhaBADLD78 F'</i> [ <i>traD36 proAB lacIqZ</i> $\Delta$ M15 Tn10 (TetR)] F' | This study |
| <i>E. coli</i> BL21 Star (DE3)  | F-ompT hsdSB (rB <sup>-</sup> mB <sup>-</sup> ) gal dcm (DE3)                                                                                                                | Invitrogen |
| BW25113 F' $\Delta$ <i>mhpE</i> | BW25113 (F') with $\Delta$ <i>mhpE</i> and Kanamycin resistance marker removed                                                                                               | This study |
| RARE                            | <i>E. coli</i> MG1655 (DE3) $\Delta$ <i>dkgB</i> $\Delta$ <i>yeaE</i> $\Delta$ ( <i>yqhC-dkgA</i> ) $\Delta$ <i>yahK</i> $\Delta$ <i>yjgB</i>                                | 4          |
| S4                              | <i>E. coli</i> MG1655 (DE3) $\Delta$ ( <i>yqhC-dkgA</i> )::Kan $\Delta$ <i>yahK</i> $\Delta$ <i>yjgB</i>                                                                     | 4          |
| S4F                             | S4 strain with F' plasmid and Kanamycin resistance marker removed                                                                                                            | This study |
| FJKA                            | <i>E. coli</i> BW25113 (F') transformed with pZE-FJKA and pCS-xylE-aroY-hp1                                                                                                  | This study |
| FDKA                            | <i>E. coli</i> BW25113 (F') transformed with pZE-FDKA and pCS-xylE-aroY-hp1                                                                                                  | This study |
| GJKA                            | <i>E. coli</i> BW25113 (F') transformed with pZE-GJKA and pCS-xylE-aroY-hp1                                                                                                  | This study |
| GDKA                            | <i>E. coli</i> BW25113 (F') transformed with pZE-GDKA and pCS-xylE-aroY-hp1                                                                                                  | This study |
| XH                              | <i>E. coli</i> S4F transformed with pZE-XCH and pCS-xylE                                                                                                                     | This study |
| XB                              | <i>E. coli</i> S4F transformed with pZE-XCB and pCS-xylE                                                                                                                     | This study |
| XBCD                            | <i>E. coli</i> S4F transformed with pZE-XCBCD and pCS-xylE                                                                                                                   | This study |
| XMH                             | <i>E. coli</i> S4F transformed with pZE-XCH and pCS-xylE-mhpDFE                                                                                                              | This study |
| XMB                             | <i>E. coli</i> S4F transformed with pZE-XCB and pCS-xylE-mhpDFE                                                                                                              | This study |
| XMBCD                           | <i>E. coli</i> S4F transformed with pZE-XCBCD and pCS-xylE-mhpDFE                                                                                                            | This study |
| VXMB                            | <i>E. coli</i> S4F transformed with pZE-VXCH and pCS-xylE-mhpDFE                                                                                                             | This study |
| VXMH                            | <i>E. coli</i> S4F transformed with pZE-VXCB and pCS-xylE-mhpDFE                                                                                                             | This study |

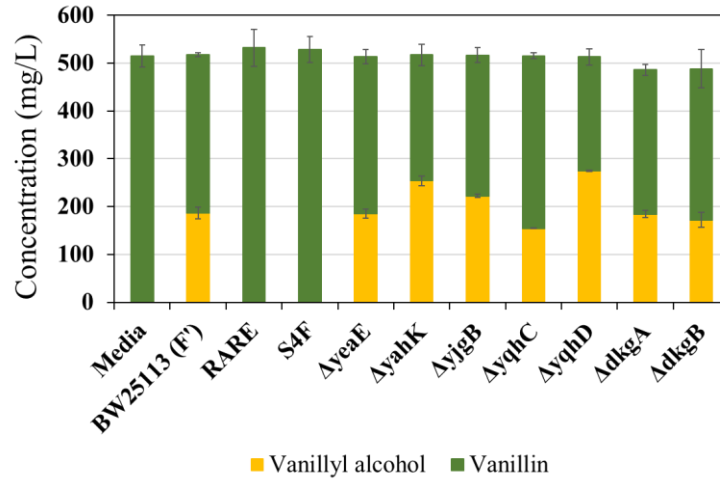

**Supplementary Figure 1. Screening of reductase deficient strains for vanillyl alcohol removal.** Media: uninoculated media supplemented with vanillin. The error bars represent the standard deviations of two biological replications.

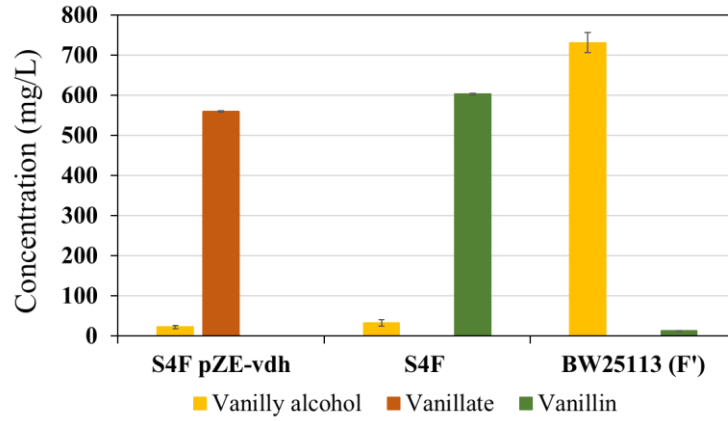

**Supplementary Figure 2. Improvement of aromatic degradation efficiency by S4F and high-copy number *vdh*.** All test groups were supplemented with 600 mg/L vanillin. The error bars represent the standard deviations of two biological replications.

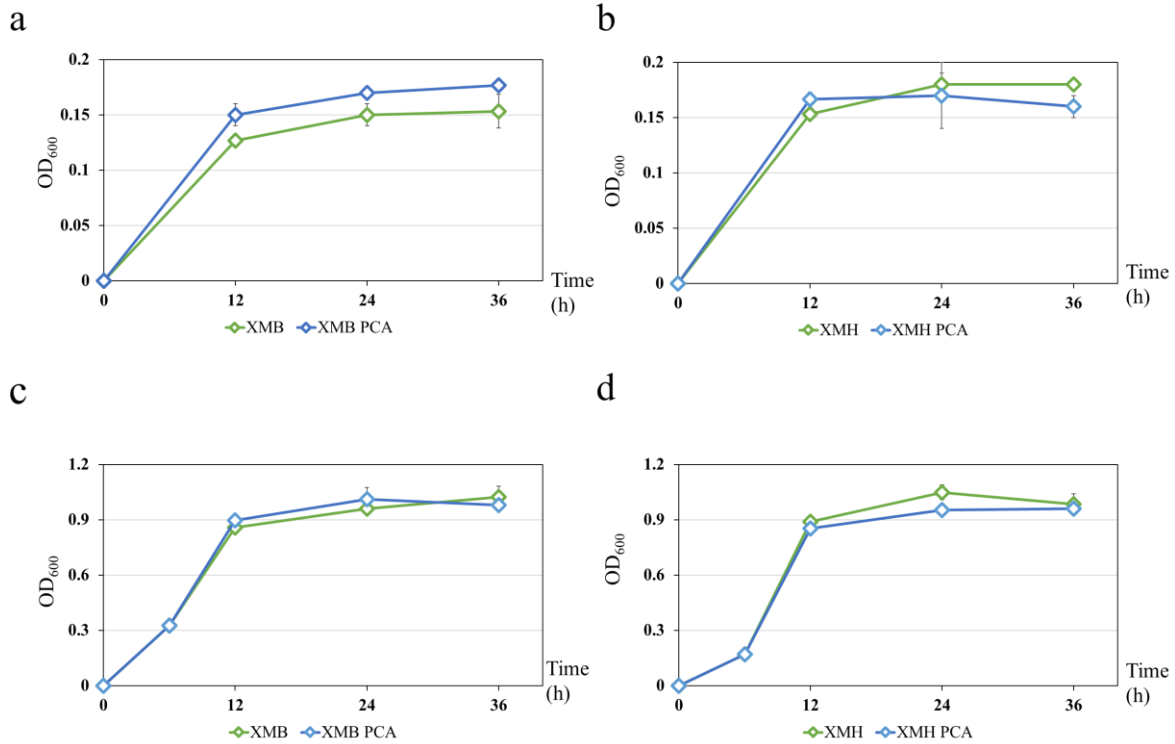

**Supplementary Figure 3. Investigation of growth promotion effect of lignin aromatics as the sole carbon source for the synthetic ligninolysis.** (a) and (b) Growth profiles of strains grew in M9-0.5Y media. (c) and (d) Growth profiles of strains grew in M9-5Y media. PCA: strains were fed with 0.5 g/L PCA. The error bars represent the standard deviations of three biological replications.

## References

1. Lutz, R. & Bujard, H. Independent and tight regulation of transcriptional units in *Escherichia coli* via the LacR/O, the TetR/O and AraC/I1-I2 regulatory elements. *Nucleic acids research* **25**, 1203-1210 (1997).
2. Lin, Y., Shen, X., Yuan, Q. & Yan, Y. Microbial biosynthesis of the anticoagulant precursor 4-hydroxycoumarin. *Nature communications* **4**, 1-8 (2013).
3. Datsenko, K.A. & Wanner, B.L. One-step inactivation of chromosomal genes in *Escherichia coli* K-12 using PCR products. *Proceedings of the National Academy of Sciences* **97**, 6640-6645 (2000).
4. Kunjapur, A.M., Tarasova, Y. & Prather, K.L. Synthesis and accumulation of aromatic aldehydes in an engineered strain of *Escherichia coli*. *Journal of the American Chemical Society* **136**, 11644-11654 (2014).
